# Supplementary figures and images for: Investigating and managing suspected pulmonary embolism in an outpatient setting: the Leicester experience
Source: HighWire-hosted journal article supplement (doi:10.1136/thoraxjnl-2014-205513), 2014-04-24

Algorithm for investigation of suspected pulmonary embolism

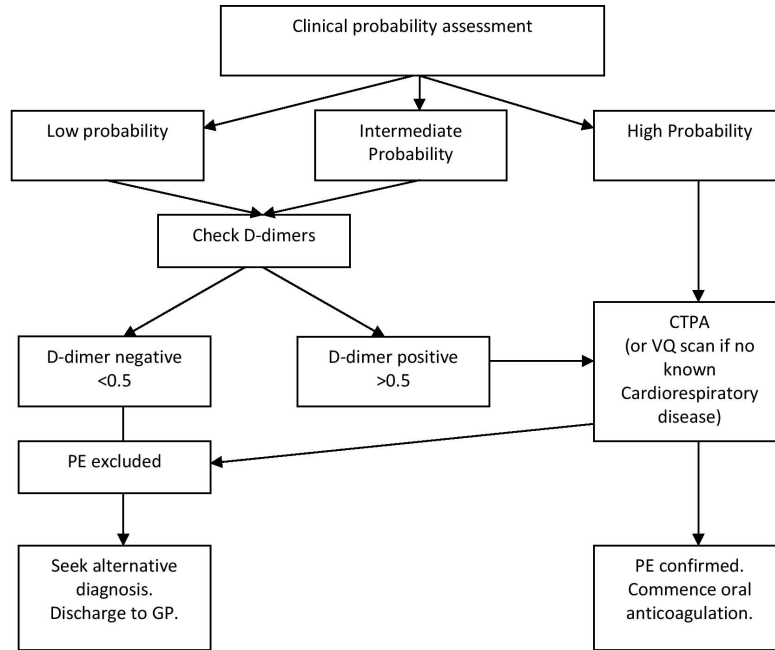

Supplement: thoraxjnl-2014-205513supp_figure.pdf [file thoraxjnl-2014-205513supp_figure.pdf]
